# Supplementary material for: Rational design and characterization of novel phosphorescent rhenium(i) complexes for extremely high-efficiency organic light-emitting diodes
Source: Royal Society of Chemistry journal article supplement (doi:10.1039/c7tc02466e), 2017-01-01
Supplement: c7tc02466e1.pdf [file c7tc02466e1.pdf]

## Supplementary Information

### **Rational design and characterization of novel phosphorescent rhenium (I) complexes for extremely high-efficiency organic light-emitting diodes**

Xiao Li <sup>\*,a</sup>, Guang-Wei Zhao<sup>a</sup>, Yong-Xu Hu<sup>a</sup>, Jin-Hui Zhao<sup>a</sup>, Yan Dong<sup>a</sup>, Li Zhou<sup>a</sup>, Yan-Li Lv<sup>a</sup>, Hai-Jun Chi<sup>a</sup>, and Zisheng Su <sup>\*,b</sup>

<sup>a</sup>School of Chemical Engineering, University of Science and Technology Liaoning (USTL), Anshan 114051, People's Republic of China

<sup>b</sup> State Key Laboratory of Luminescence and Applications, Changchun Institute of Optics, Fine Mechanics, and Physics, Chinese Academy of Sciences, Changchun 130033, People's Republic of China

\* Corresponding authors. E-mails: [xiaoli@ustl.edu.cn](mailto:xiaoli@ustl.edu.cn); (X. Li); [suzs@ciomp.ac.cn](mailto:suzs@ciomp.ac.cn) (Z. Su).

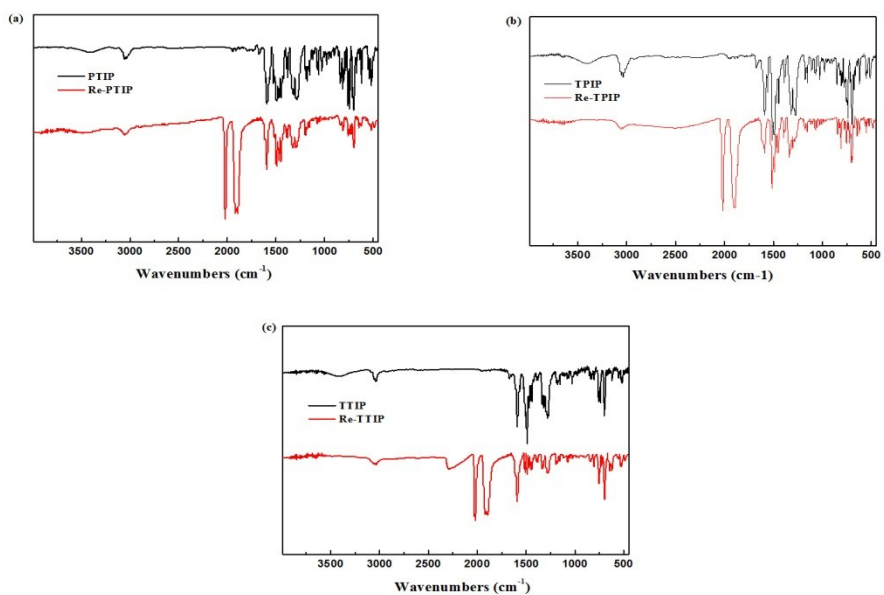

Figure S1 FT-IR spectra of PTIP and Re-PTIP (a), TPIP and Re-TPIP (b), TTIP and Re-TTIP (c).

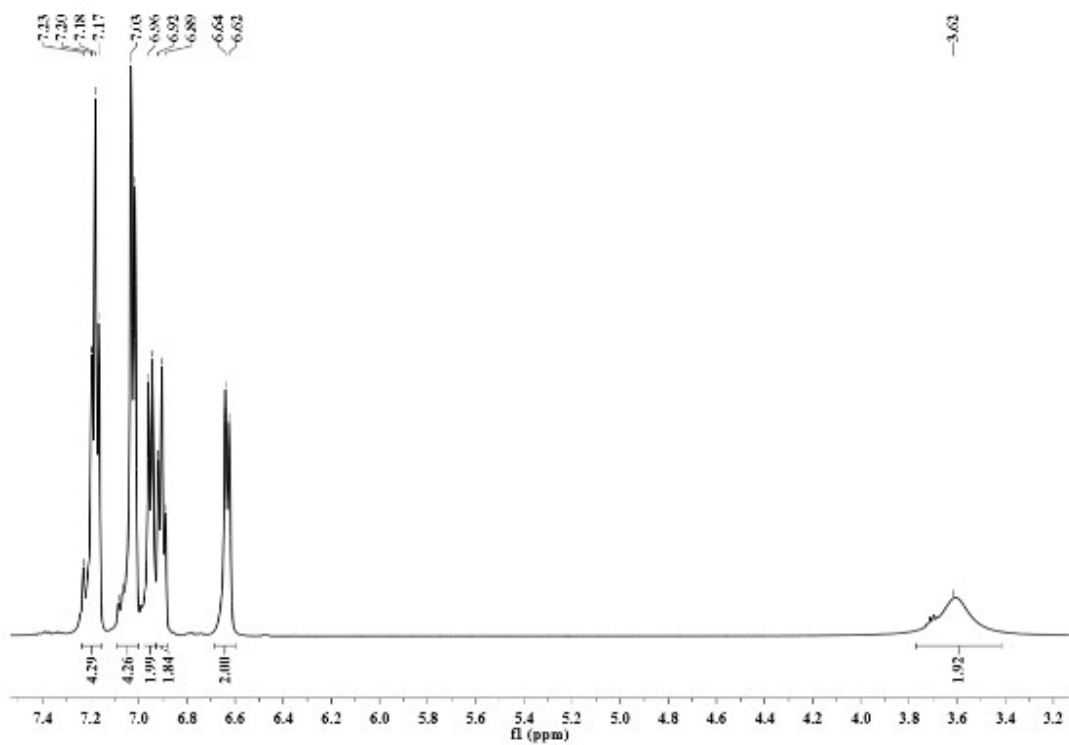

Figure S2  $^1\text{H}$  NMR of 4-(diphenylamino)aniline.

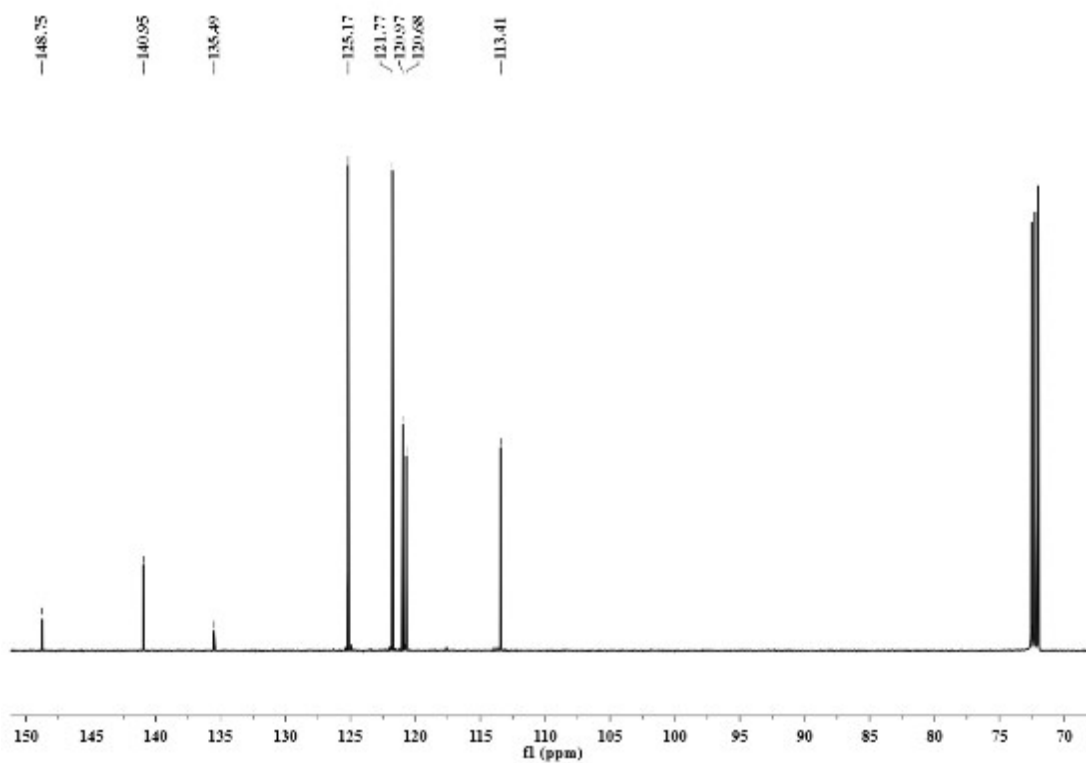

Figure S3  $^{13}\text{C}$  NMR of 4-(diphenylamino)aniline.

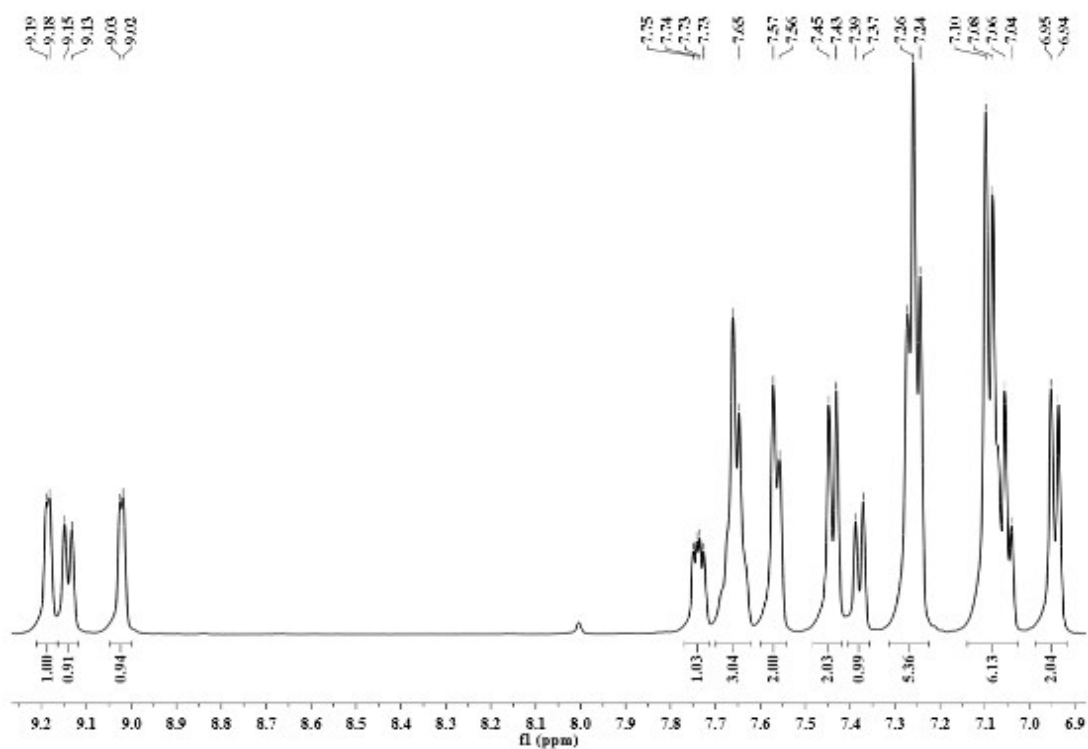

Figure S4  $^1\text{H}$  NMR of PTIP.

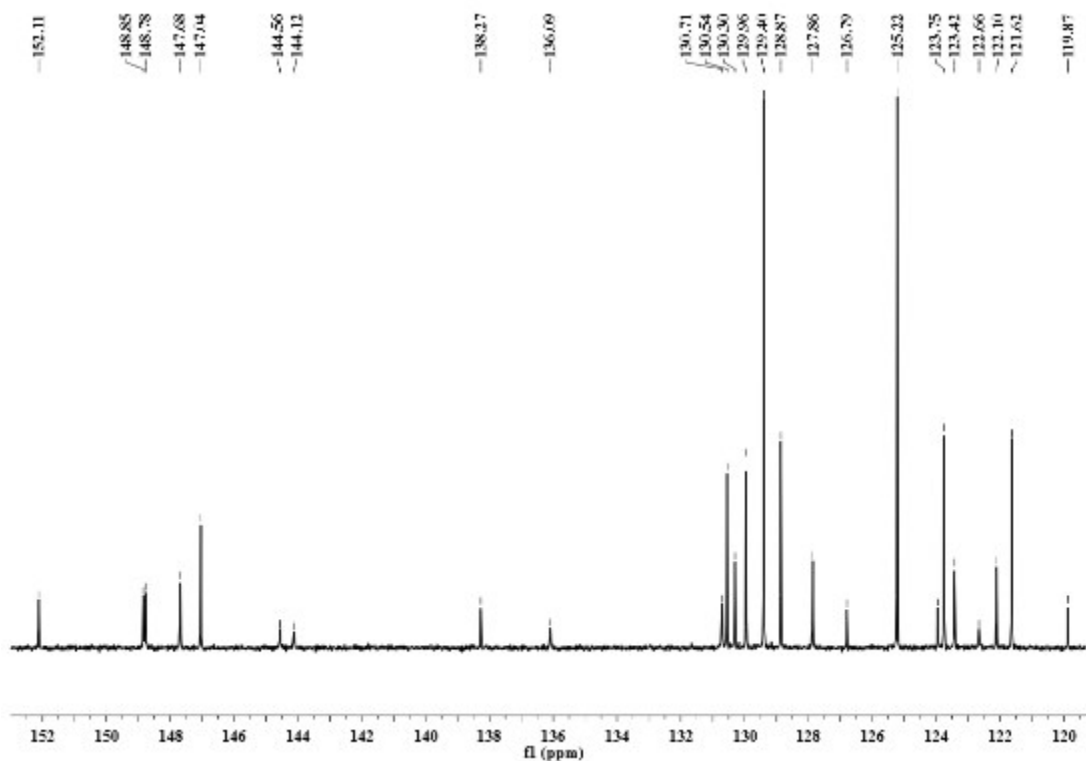

Figure S5  $^{13}\text{C}$  NMR of PTIP.

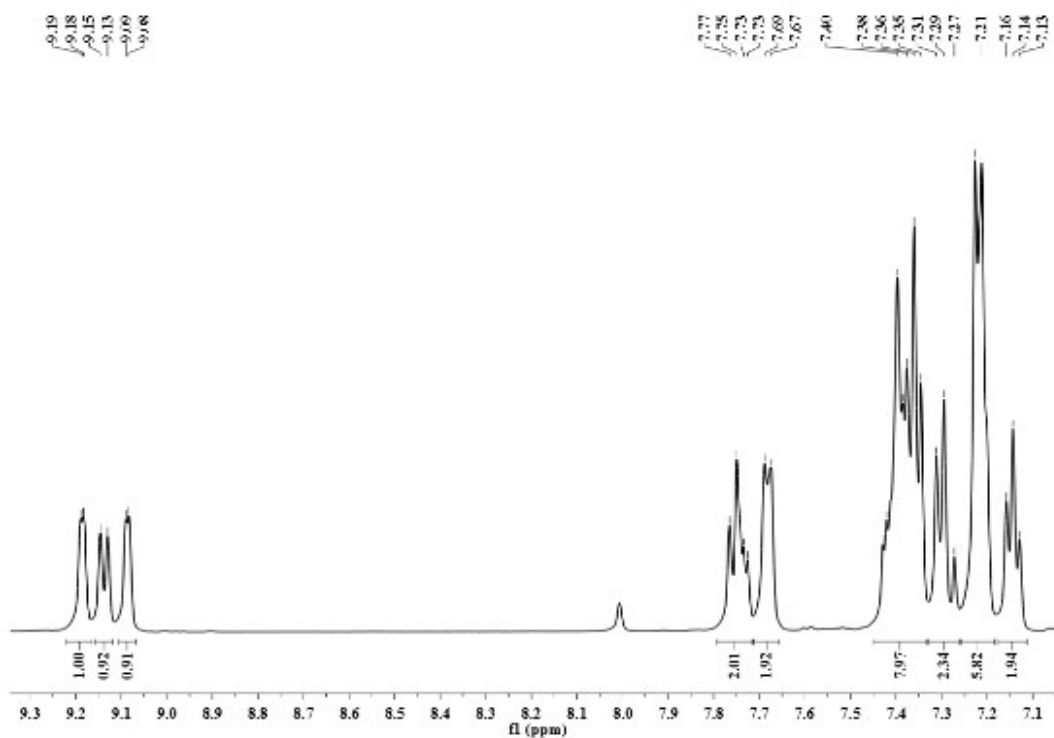

Figure S6  $^1\text{H}$  NMR of TPIP.

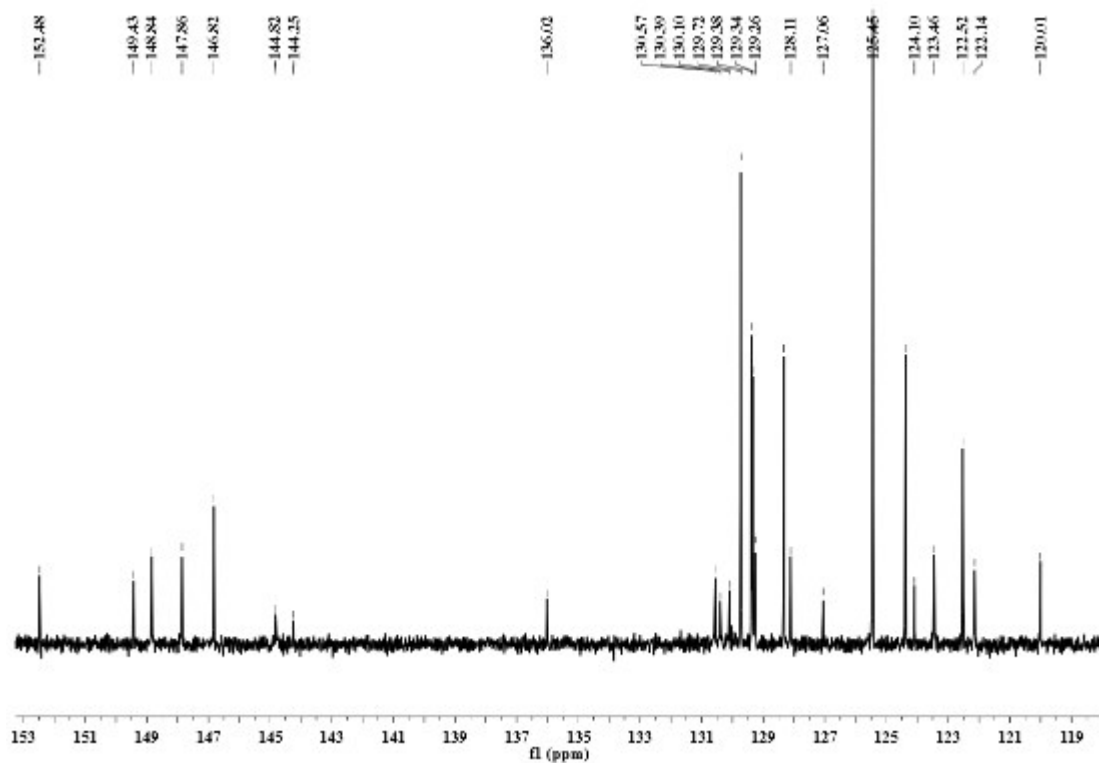

Figure S7  $^{13}\text{C}$  NMR of TPIP.

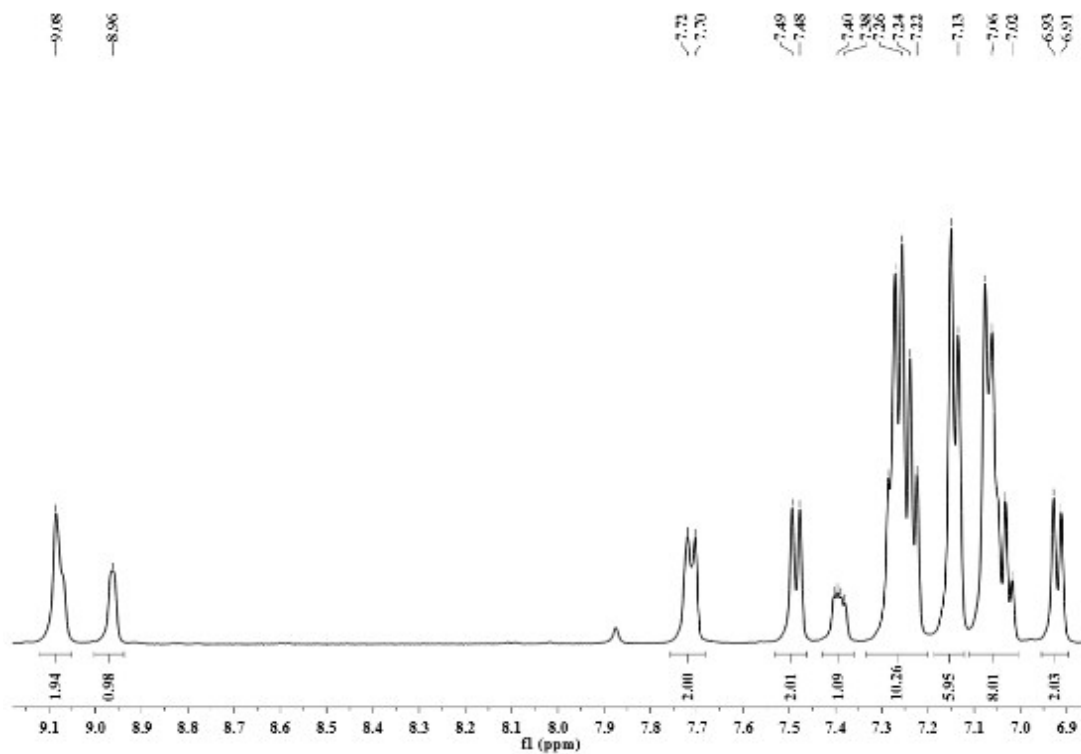

Figure S8  $^1\text{H}$  NMR of TTIP.

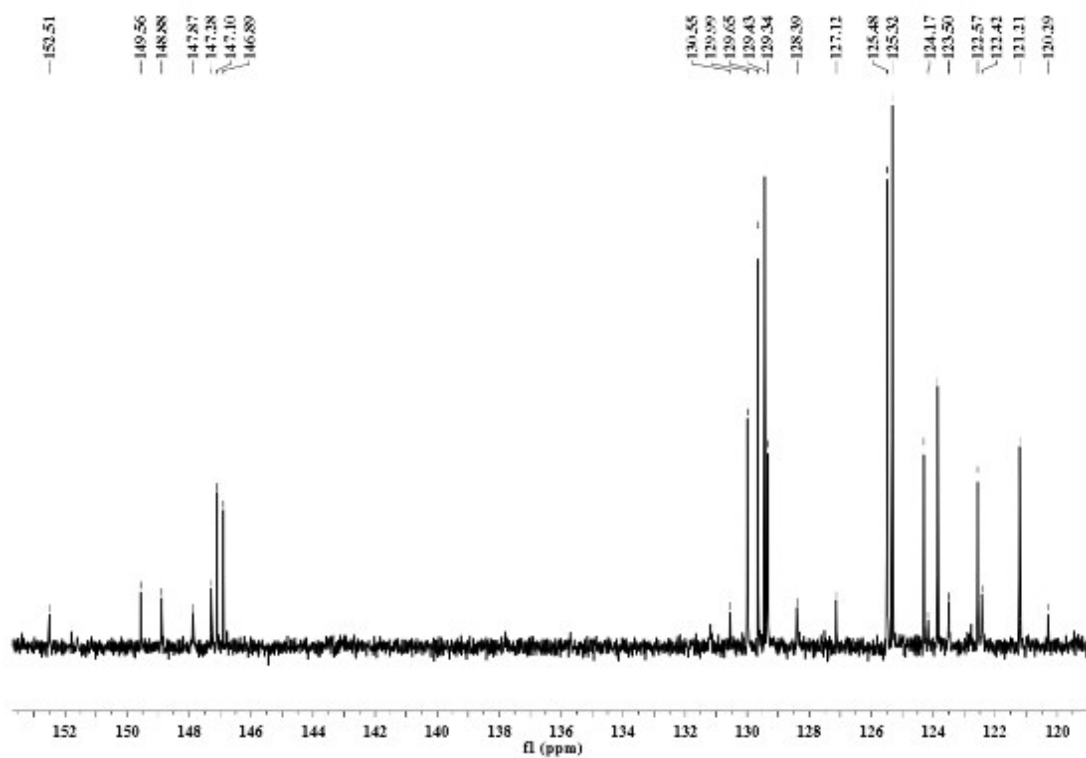

Figure S9  $^{13}\text{C}$  NMR of TTIP.

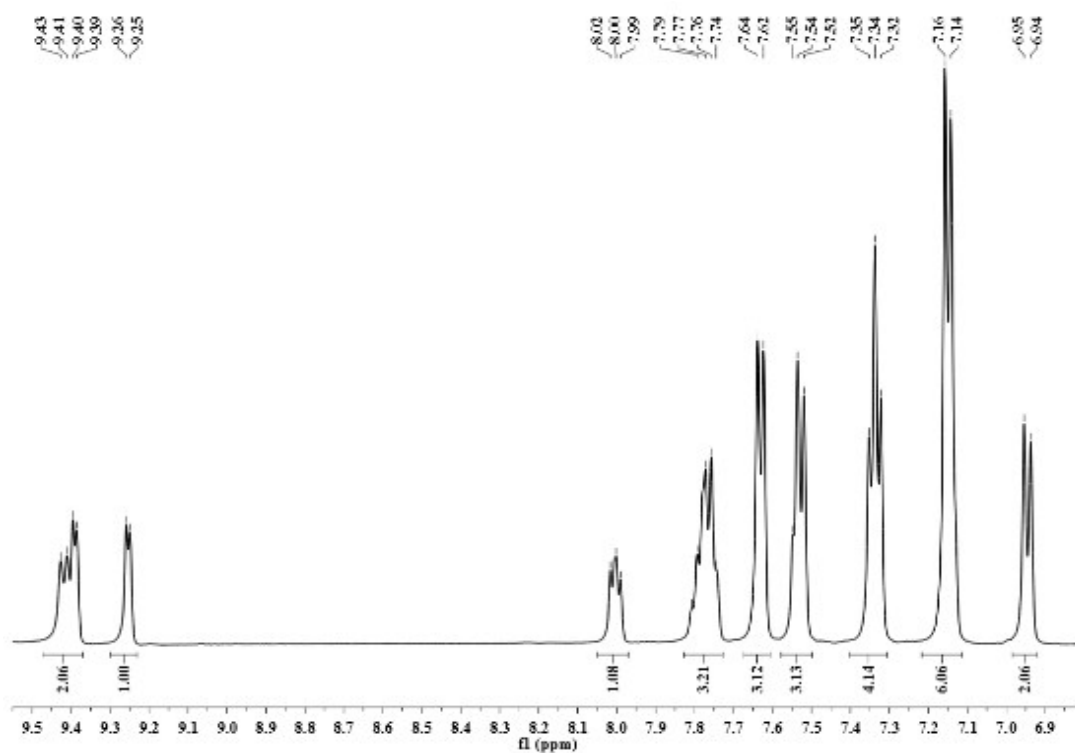

Figure S10  $^1\text{H}$  NMR of Re-PTIP.

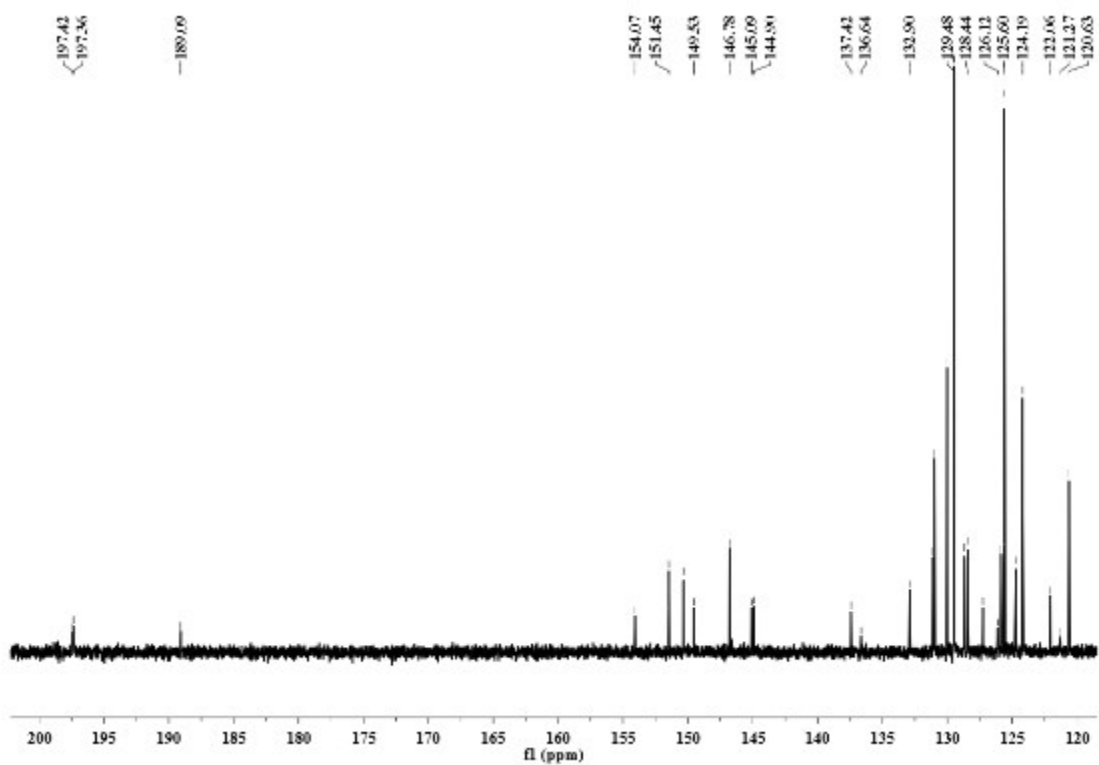

Figure S11  $^{13}\text{C}$  NMR of Re-PTIP.

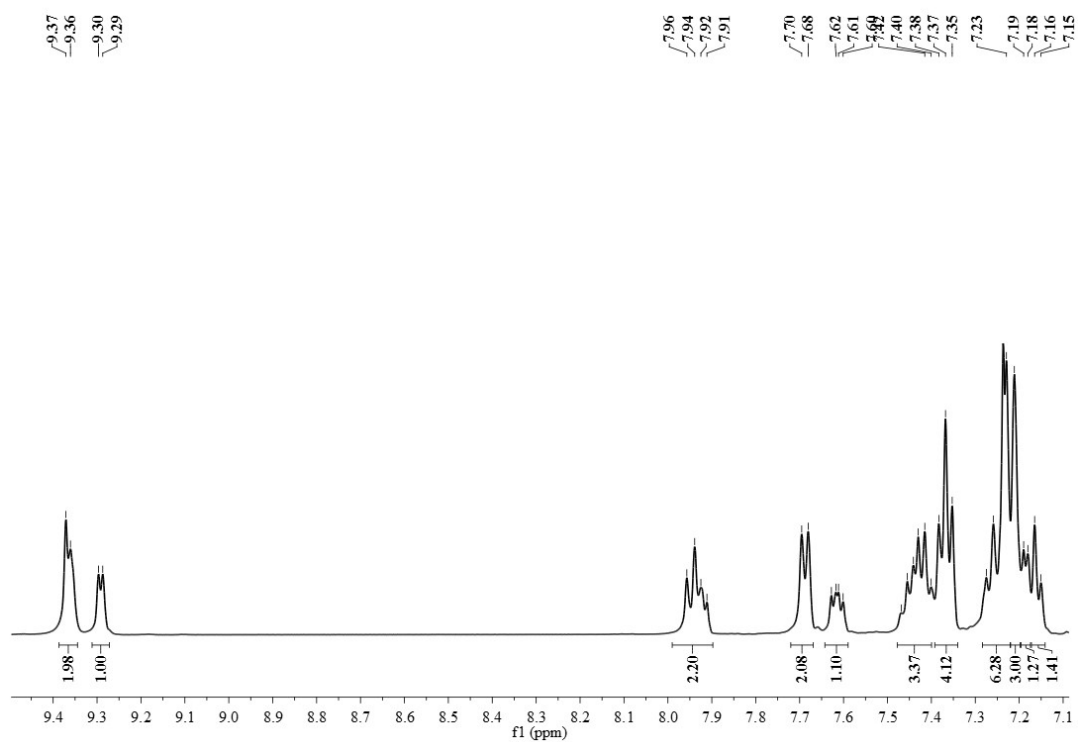

Figure S12  $^1\text{H}$  NMR of Re-TPIP.

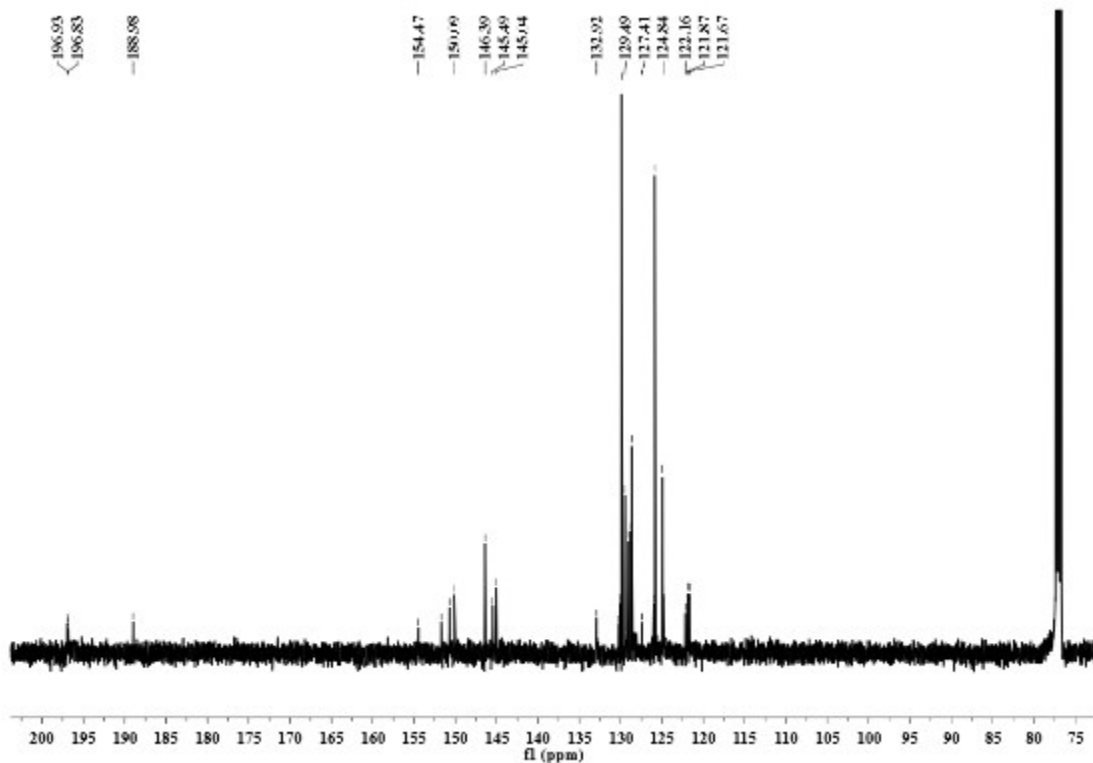

Figure S13  $^{13}\text{C}$  NMR of Re-TPIP.

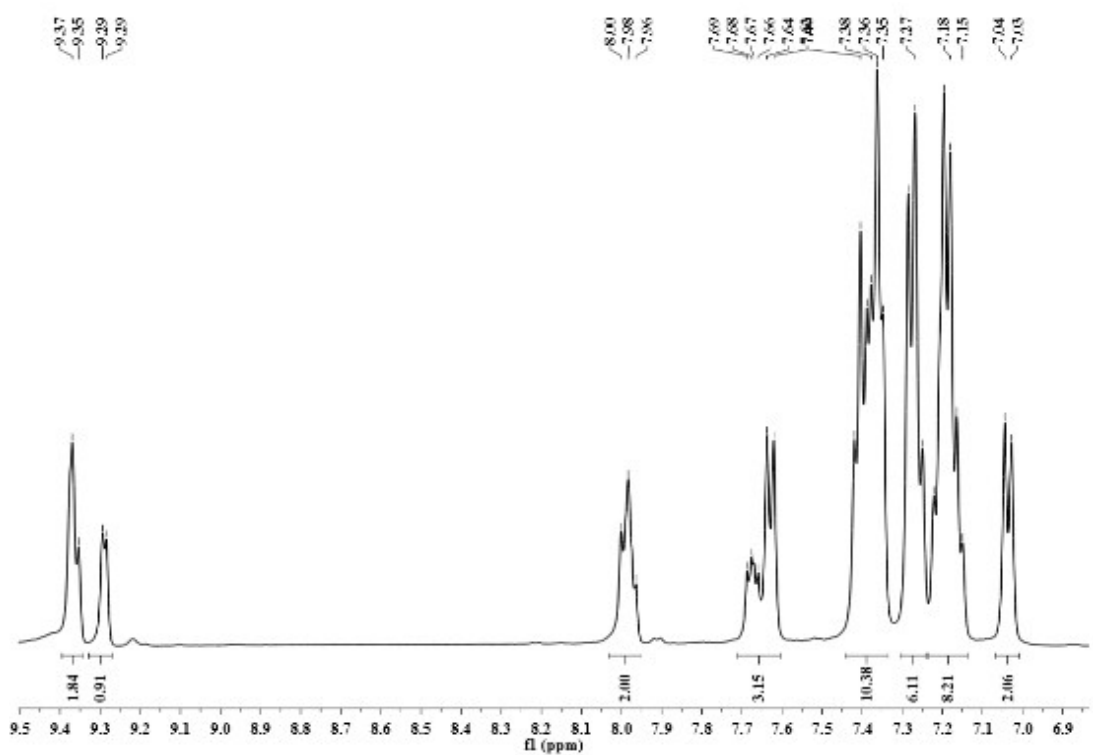

Figure S14  $^1\text{H}$  NMR of Re-TTIP.



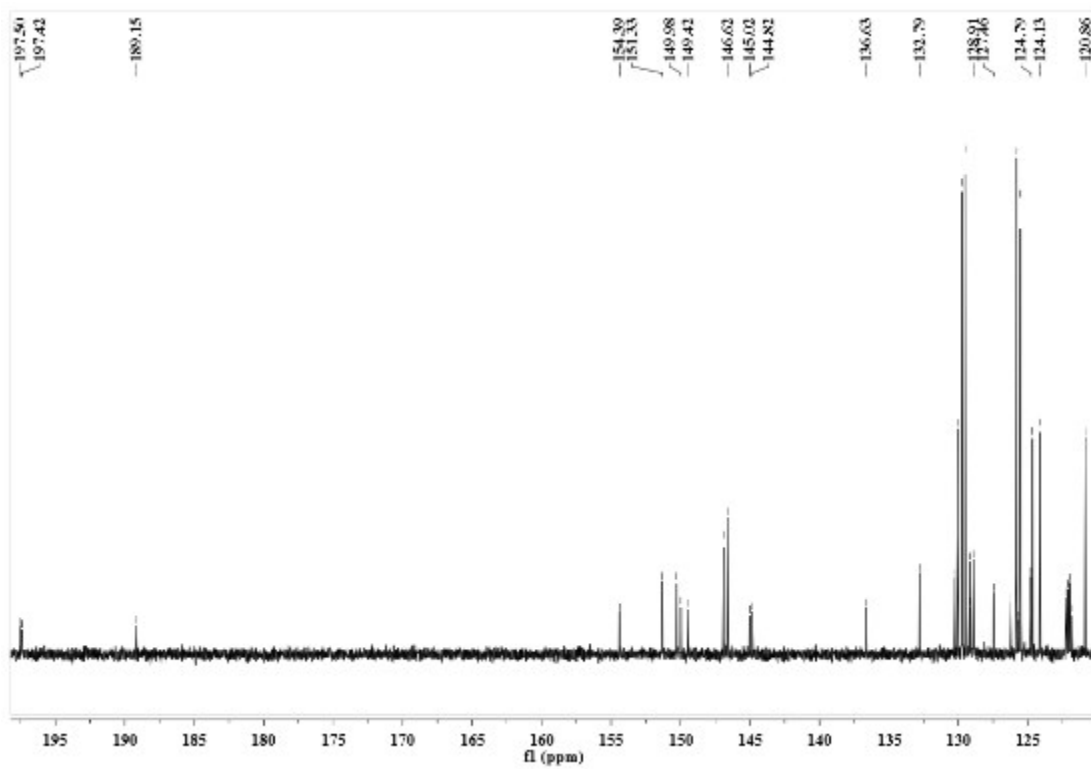

Figure S15  $^{13}\text{C}$  NMR of Re-TTIP.
